# Supplementary material for: Recognition of stapled histone H3K4me3 peptides by epigenetic reader proteins
Source: Royal Society of Chemistry journal article supplement (doi:10.1039/d2cc04294k), 2022-01-01
Supplement: d2cc04294k1.pdf [file d2cc04294k1.pdf]

## Supplementary Information

### Recognition of stapled histone H3K4me3 peptides by epigenetic reader proteins

Peter Betlem,<sup>a</sup> Marijn N. Maas,<sup>b</sup> Jim Middelburg,<sup>a</sup> Bas J. G. E. Pieters,<sup>a</sup> Jasmin Mecinović<sup>\*ab</sup>

<sup>a</sup> Radboud University, Institute for Molecules and Materials, Heyendaalseweg 135, 6525 AJ Nijmegen, The Netherlands.

<sup>b</sup> University of Southern Denmark, Department of Physics, Chemistry and Pharmacy, Campusvej 55, 5230 Odense, Denmark.

\* E-mail: mecinovic@sdu.dk; Tel.: +45-6550-3603

## Table of Contents

|                                                                              |    |
|------------------------------------------------------------------------------|----|
| Table of Contents .....                                                      | 2  |
| 1.1 General Methods .....                                                    | 3  |
| 1.2 Methods.....                                                             | 3  |
| 1.3 Materials.....                                                           | 4  |
| 2 Synthesis of Fmoc-Kme3-OH.....                                             | 4  |
| 3 Synthesis and purification of linear and constrained histone peptides..... | 6  |
| 3.1 General Solid-phase peptide synthesis.....                               | 6  |
| 3.2 Histone H3K4me3 thioether peptide synthesis .....                        | 6  |
| 4 Preparative HPLC of histone H3K4me3 peptides.....                          | 10 |
| 5 LC-MS of histone H3K4me3 peptides.....                                     | 10 |
| 6 IR spectra.....                                                            | 18 |
| 7 ITC supporting figures .....                                               | 19 |
| 8 Docking .....                                                              | 22 |
| 9 References .....                                                           | 24 |

## 1.1 General Methods

### 1.2 Methods

$^1\text{H}$ -NMR, and  $^{13}\text{C}$ -NMR spectra were recorded on a Varian Inova 400 MHz NMR at 300 K.  $^{19}\text{F}$ -NMR spectra were recorded on a Bruker Avance III 400 MHz. Chemical shifts are reported in parts per million ( $\delta$ ) relative to tetramethylsilane as an internal reference ( $\delta = 0.00$  ppm). Coupling constants are reported as J-values in Hz. The following abbreviations are used to assign the multiplicities: s = singlet, d = doublet, t = triplet, q = quartet, m = multiplet. NMR data was analyzed using Mestrenova. FT-IR spectra were recorded using a Bruker Tensor 27 ((source: globalbar 10K - 30  $\text{cm}^{-1}$ ); detector: DTGS (12K - 250  $\text{cm}^{-1}$ ); beamsplitter: KBr (30 - 7800  $\text{cm}^{-1}$ )). ESI-MS mass spectrometry data was obtained using a Thermo Finnigan LCQ Advantage Max (ThermoFischer, Breda, the Netherlands). Samples were injected with methanol at room temperature. LC-MS data was obtained using a Thermo Finnigan LCQ LCQ-Fleet ESI-ion trap (ThermoFischer, Breda, the Netherlands) equipped with a Phenomenex® Gemini-NX C18 column, 50 x 2.0 mm, particle size 3  $\mu\text{M}$  (Phenomenex, Utrecht, The Netherlands). Samples were eluted using a gradient of  $\text{H}_2\text{O}/\text{ACN}$  containing 0.1 % formic acid (5-100 %, 1-50 min, flow 0.2  $\text{mL min}^{-1}$ ). MALDI-TOF spectra were analyzed with a Bruker Biflex III MALDI-TOF MS. Samples for MALDI-TOF were prepared by compound dilution with a saturated alpha-Cyano-4-hydroxycinnamic acid matrix solution in  $\text{H}_2\text{O}:\text{ACN}$  (1:1). Mass spectra data was analyzed with Bruker FlexAnalysis. Compounds were purified using a Shimadzu preparative HPLC equipped with a Phenomenex® Gemini-NX 3u C18 110A reversed-phase column (150 x 21.2 mm) using gradient elution at constant flow rate of 10  $\text{mL/min}$  at a constant temperature of 30  $^\circ\text{C}$ . Target compounds were eluted with  $\text{H}_2\text{O}/\text{ACN}$  solutions containing 0.1% trifluoroacetic acid. Purified fractions were combined and subsequently lyophilized using an ilShin Freeze Dryer (ilShin, Ede, The Netherlands). Reader domain proteins were expressed and purified as described previously.<sup>1, 2</sup> Reader proteins and histone peptides were dissolved in the same buffers (Table S1). UV/Vis spectroscopy (280 nm) was used to determine the protein concentration. Calorimetric data was recorded with a fully automated Microcal Auto-iTC200 (GE Healthcare). Reader protein (25-30  $\mu\text{M}$ ) was titrated with histone peptide (300-350  $\mu\text{M}$ ) solutions over 19 injections. ITC experiments were done in replicates, and subsequent curve fitting was performed by Origin 6.00 (Microcal Inc., Northampton, MA) with a one-site model.

### 1.3 Materials

All reagents were obtained from commercial sources and used without further purifications. Fmoc amino acid derivatives, N,N'-Disopropylcarbodiimide (DIPCDI), and 1-Hydroxybenzotriazole (HOBt) were obtained from Novabiochem (EMD Chemicals, Gibbstown, USA). Triisopropylsilane (TIS), N,N,-diisopropylethylamine (DIPEA), trifluoroacetic acid (TFA), and piperidine were purchased from Sigma-Aldrich. N,N-dimethylformamide (DMF) solvent for peptide synthesis and gradient degree high-performance liquid chromatography (HPLC) acetonitrile were purchased from ActuaAll Chemicals b.v (Oss, The Netherlands).

### 2 Synthesis of Fmoc-Kme3-OH

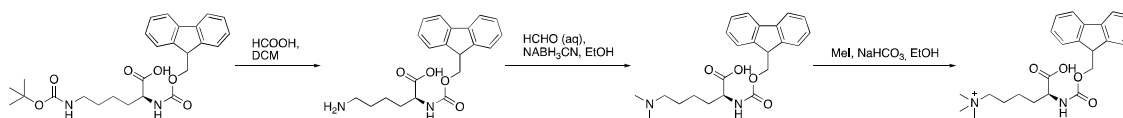

Scheme S1. Synthetic procedure for preparation of Fmoc-LysMe3-OH

#### (((9H-fluoren-9-yl)methoxy)carbonyl)-L-lysine (Fmoc-K-OH)

Fmoc-Lys(Boc)-OH (5.47 g, 11.67 mmol, 1.0 eq.) was dissolved in formic acid (40 mL) and DCM (40 ml). The reaction mixture was stirred overnight at RT. The volatiles were removed *in vacuo* and the remaining residual oil was co-evaporated with  $\text{CHCl}_3$  (10 mL, 2x),  $\text{Et}_2\text{O}$  (10 mL, 2x) and toluene (10 mL, 2x), affording a white solid (4.72 g, 11.32 mmol, 97%). MS (MeOH, p ESI, 10 eV)  $[\text{M}+\text{H}]^{1+}$  calc.: 369.2, found: 369.2.

#### N<sup>2</sup>-(((9H-fluoren-9-yl)methoxy)carbonyl)-N<sup>6</sup>,N<sup>6</sup>-dimethyl-L-lysine (Fmoc-Kme2-OH)

Fmoc-K-OH (1.2 g, 2.89 mmol, 1.0 eq.) was dissolved in ethanol (20 mL). Formaldehyde (37% solution, 1.5 mL, 20.2 mmol, 6.4 eq.) was added dropwise followed by an addition of  $\text{NaBH}_3\text{CN}$  (500.6mg, 7.96mmol, 2.6 eq.) while stirring followed by stirring the reaction for 4.5 h at RT. Completion was monitored by TLC (10% methanol in DCM) and ESI-MS. The mixture was quenched with trifluoroacetic acid (3 mL). Volatiles were removed *in vacuo* and the residual oil was subsequently extracted with  $\text{Et}_2\text{O}$  (10 mL, 1x), DCM (10 mL, 1x), and ethanol (10 mL, 1x) and dried until no further reduction in weight was observed. The crude product was used in

the next step without further purification. MS (MeOH, p ESI, 10 eV)  $[M+H]^{1+}$  calc.: 397.2, found: 397.1.

**(S)-5-(((9H-fluoren-9-yl)methoxy)carbonyl)amino)-5-carboxy-N,N,N-trimethylpentan-1-aminium (Fmoc-Kme3-OH)**

To a stirred suspension of Fmoc-Kme2-OH (1.15g, 2.89mmol, 1 eq.) in ethanol (20 mL) iodomethane (25 mL, 401.5 mmol, 176 eq.) and  $\text{NaHCO}_3$  (1.5 g, 23.8 mmol, 8 eq.) were added. The mixture was left stirring for 5 days at RT and completion was monitored using ESI-MS. Volatiles were removed in vacuo upon consumption of the starting material, affording an oil which was purified by prep-HPLC (5% to 5% in 3 min to 45% in 4.5 min to 55% in 9.5 min to 100% in 1 min). Collected fractions were lyophilized to yield a white powder for use in solid phase peptide synthesis. (534.8 mg, 1.3 mmol, 45%). MS (MeOH, p ESI, 10 eV)  $[M+H]^{1+}$  calc.: 411.2; found: 411.2. LC-MS ( $\text{H}_2\text{O}$ , ITMS + p ESI, 10 eV) 397.44 (8%,  $[M+H]^{1+}$ ), 411.40 (100%,  $[M+H]^{1+}$ ), 821.28 (50%,  $[2\times M+H]^{1+}$ ).  $^1\text{H-NMR}$  (400MHz,  $\text{CD}_3\text{OD}$ ):  $\delta$  7.75 (d, 2H, FmocC<sub>4</sub>H<sub>2</sub>), 7.67 (t, 2H, FmocC<sub>1</sub>H<sub>2</sub>), 7.38 (t, 2H, FmocC<sub>3</sub>H<sub>2</sub>), 7.32 (t, 2H, FmocC<sub>2</sub>H<sub>2</sub>), 4.38 (m, 1H, OCH<sub>2</sub>CH), 4.32 (m, 1H, NH $^\alpha$ CHCOOH), 4.17 (t, 2H, OCH<sub>2</sub>CH), 3.25 (m, 2H,  $^\delta\text{CH}_2^\epsilon\text{CH}_2\text{N}(\text{CH}_3)_3$ ), 3.15 (s, 9H, N(CH<sub>3</sub>)<sub>3</sub>), 1.82 (m, 1H,  $^\alpha\text{CH}^\beta\text{CHH}^\gamma\text{CH}_2$ ), 1.75 (m, 3H,  $^\alpha\text{CH}^\beta\text{CHH}^\gamma\text{CH}_2$ ,  $^\gamma\text{CH}_2^\delta\text{CH}_2^\epsilon\text{CH}_2$ ), 1.44 (m, 2H,  $^\beta\text{CH}_2^\gamma\text{CH}_2^\delta\text{CH}_2$ ).  $^{13}\text{C-NMR}$  (400MHz,  $\text{CD}_3\text{OD}$ ):  $\delta$  174.1, 157.3, 143.8, 141.1, 127.4, 126.8, 124.8, 119.6, 66.5, 66.0, 53.5, 52.1, 47.6, 30.6, 22.3, 21.0.

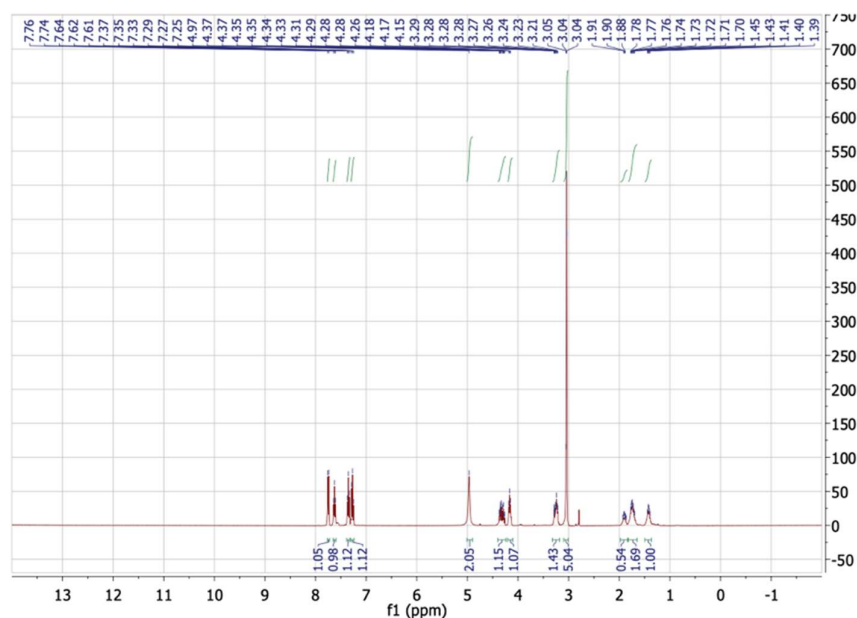

Figure S1.  $^1\text{H NMR}$  spectrum of Fmoc-Kme3-OH.

### 3 Synthesis and purification of linear and constrained histone peptides

#### 3.1 General Solid-phase peptide synthesis

Synthesis of H3 10-mer peptides was achieved by solid-phase peptide synthesis using a semi-automated solid phase peptide synthesiser with the Fmoc chemistry method. Peptides were loaded on a Wang resin, and side chain protection was as follows: Arg(Pbf), Thr(tBu), Gln(Trt), Lys(Boc), and Ser(tBu). Coupling required premixing of Fmoc-protected amino acid (3.0 eq.), DPCDI (3.3 eq.) in DMF and HOBt (3.6 eq.) in DMF for 2 min. before being added to resin. Agitating the resin for 1-2 h at RT. The Fmoc protection group was removed by treating the resin with a large excess of piperidine (20% in DMF) for 30 min at RT. Each coupling and deprotection is followed by extensive washing of the resin with DMF (3x), followed by a colour Kaiser test to monitor reaction completion. After deprotection of the final Fmoc protection group, the resin was extensively washed with DCM (3x), MeOH (3x) and Et<sub>2</sub>O (3x), after which the resin is subsequently treated with a mixture of TFA/TIS/H<sub>2</sub>O/EDT (92.5/2.5/2.5/2.5). Agitation at RT for 4 hours was followed by precipitation of the peptide in ice cold Et<sub>2</sub>O (-20 °C). The precipitate was centrifugated (5000 rpm, 3 min, 4 °C, Hermle 220.72 v04) and the product was recovered by decantation of the Et<sub>2</sub>O (3x). Residual Et<sub>2</sub>O was removed by evaporation, and the peptides were purified with Prep-HPLC (Table S1). The fractions with purified peptides were subsequently pooled and lyophilized to yield a white powder. Peptides were identified with LC-MS and MALDI-TOF (Table S2).

#### 3.2 Histone H3K4me3 thioether peptide synthesis

##### Ethane linker (2)

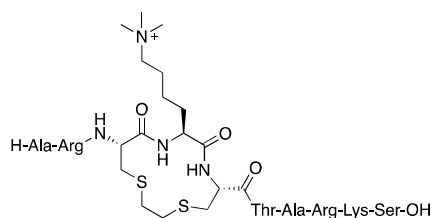

To a stirring solution of H-ARC-Kme3-CTARKS-OH (20 mg, 0.0172 mmol, 1 eq.) in DMF (0.5mL) 1,2-Dibromoethane (9.66 mg, 9  $\mu$ L, 102.8  $\mu$ mol, 6 eq.) was added followed by triethylamine (7.5  $\mu$ L, 0.053 mmol, 3.1 eq.). The mixture was stirred for 7 h at RT and completion was monitored using LC-MS. The reaction was quenched with TFA (0.05 mL) upon completion and volatiles were subsequently removed *in vacuo*. The residual oil was purified using prep-HPLC and the combined fractions were lyophilized. Analysis by LC-MS indicated the pure retrieval of **2** (7.9 mg, 6.66  $\mu$ mol, 38.7%). MS (H<sub>2</sub>O, p ESI, 10 eV) [M+3H]<sup>3+</sup> calc.: 397.9; found: 397.9, [M+2H]<sup>2+</sup> calc.: 596.3; found: 596.4, [M+H]<sup>1+</sup> calc.: 1191.8; found: 1191.8 LCMS (H<sub>2</sub>O, ITMS + p ESI, 10 eV) 298.88 (15%, [M+4H]<sup>4+</sup>), 397.88 (100%, [M+3H]<sup>3+</sup>), 596.40 (90%, [M+2H]<sup>2+</sup>), 1191.56 (5%, [M+H]<sup>1+</sup>).

### 2,4-dinitrobenzene linker (3)

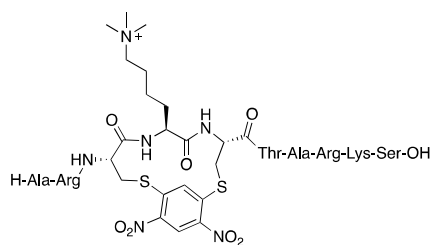

To a stirring solution of ARC-Kme3-CTARKS (18.15 mg, 0.016 mmol, 1 eq.) in DMF (0.5 mL) 1,5-difluoro-2,4-dinitrobenzene (3.3 mg, 0.016 mmol, 1 eq.) was added followed by triethylamine (7.5  $\mu$ L, 0.053 mmol, 3.3 eq.). The mixture was stirred for 45 min at RT and completion was monitored using LC-MS. The reaction was quenched with TFA (0.05 mL) upon completion and volatiles were subsequently removed *in vacuo*. The residual oil was purified using prep-HPLC and the combined fractions were lyophilized. Analysis by LC-MS indicated the pure retrieval of **3** (5.1 mg, 3.81  $\mu$ mol, 21%). LC-MS (H<sub>2</sub>O, ITMS + p ESI, 10 eV) 333.36 (75%, [M+4H]<sup>4+</sup>), 444.08 (100%, [M+3H]<sup>3+</sup>), 665.52 (80%, [M+2H]<sup>2+</sup>), 1329.64 (8%, [M+H]<sup>1+</sup>).

### 2,3,5,6-tetrafluorobenzene linker (4)

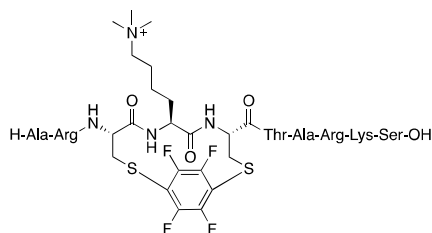

To a stirring solution of ARC-Kme3-CTARKS (16.1 mg, 0.014 mmol, 1 eq.) in DMF (1 mL) hexafluorobenzene (15.6 mg, 0.084 mmol, 6 eq.) was added followed by triethylamine (7.5  $\mu$ L, 0.053 mmol, 3.8 eq.). The mixture was stirred overnight at RT and completion was monitored using LC-MS. The reaction was quenched with TFA (0.05 mL) upon completion and volatiles were subsequently removed *in vacuo*. The residual oil was purified using prep-HPLC and the combined fractions were lyophilized. Analysis by LC-MS and <sup>19</sup>F-NMR indicated the pure retrieval of **4** (4.6 mg, 3.4  $\mu$ mol, 4%). LC-MS (H<sub>2</sub>O, ITMS + p ESI, 10 eV): 328.88 (82%, [M+4H]<sup>4+</sup>), 438.12 (100%, [M+3H]<sup>3+</sup>), 656.52 (38%, [M+2H]<sup>2+</sup>), 1311.80 (4%, [M+H]<sup>1+</sup>). <sup>19</sup>F-NMR (500 MHz, CD<sub>3</sub>OD):  $\delta$  -131.72 (dd, 1F, C1C2FC3FC4C5FC6F), -132.64 (dd, 1F, C1C2FC3FC4C5FC6F), -133.03 (dd, 1F, C1C2FC3FC4C5FC6F), -133.37 (dd, 1F, C1C2FC3FC4C5FC6F).

### 3.3 Histone H3K4me3 lactam peptide synthesis

#### **AROKme3NTARKS (5)**

Fmoc-AR(Pbf)O(Alloc)Kme3D(Allyl)T(tBu)AR(Pbf)K(Boc)S(tBu)-Wang was prepared on Wang resin (250 mg, 0.165 mmol, 0.66 mmol g<sup>-1</sup>) following described SPPS procedures. Resin was washed with DCM (3x) under Argon flow for 10 min. before addition of PHSiH<sub>3</sub> (375 μL, 4 mmol, 24 eq.) in DCM (1 mL). Reaction mixture was agitated under Argon flow for 2 min. before the addition of Pd(PPh<sub>3</sub>)<sub>4</sub> (190 mg, 0.165 mmol, 1 eq.) in DCM (3 mL). The resin was agitated for 1 h at RT under Argon flow before extensive washing with DCM (3x), DMF (3x), and DCM (3x). A colour Kaiser test was performed to check for completion of the deprotection, and side chains were cyclized by treatment of the resin with HATU (307 mg, 0.81 mmol, 4.9 eq.) and DIPEA (114 μL, 1.2 mmol, 7.5 eq.) in DMF for 2 h at RT. Completion of cyclization was monitored with a colour Kaiser test, and the resin was subsequently treated with an excess of piperidine (20% in DMF) for 30 min at RT to remove the terminal Fmoc protection group. Deprotection was monitored with a colour Kaiser test. Extended cleavage of the resin with TFA/TIS/H<sub>2</sub>O/EDT (92.5/2.5/2.5/2.5) for 18 h at RT and subsequent precipitation, prep-HPLC and lyophilization following standard SPPS procedures afforded **5** as a white solid (18.2 mg, 15.5 μmol, 8.2%). LC-MS (H<sub>2</sub>O, ITMS + p ESI, 10 eV) 293.56 (70%, [M+4H]<sup>4+</sup>), 391.08 (100%, [M+3H]<sup>3+</sup>), 586.08 (87%, [M+2H]<sup>2+</sup>), 1170.88 (9%, [M+H]<sup>1+</sup>), 1284.68 (12%, [M+tfa+H]<sup>1+</sup>).

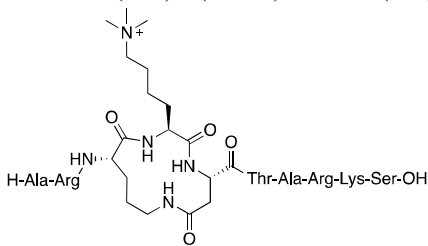

#### **AROKme3QTARKS (6)**

Fmoc-AR(Pbf)O(Alloc)Kme3E(Allyl)T(tBu)AR(Pbf)K(Boc)S(tBu)-Wang was prepared on Wang resin (240 mg, 0.158 mmol, 0.66 mmol g<sup>-1</sup>) following described SPPS procedures. Resin was washed with DCM (3x) under Argon flow for 10 min. before addition of PHSiH<sub>3</sub> (356 μL, 3.8 mmol, 24 eq.) in DCM (1 mL). Reaction mixture was agitated under Argon flow for 2 min. before the addition of Pd(PPh<sub>3</sub>)<sub>4</sub> (182 mg, 0.158 mmol, 1 eq.) in DCM (3 mL). The resin was agitated for 1 h at RT under Argon flow before extensive washing with DCM (3x), DMF (3x), and DCM (3x). A colour Kaiser test was performed to check for completion of the deprotection, and side chains were cyclized by treatment of the resin with HATU (292 mg, 0.77

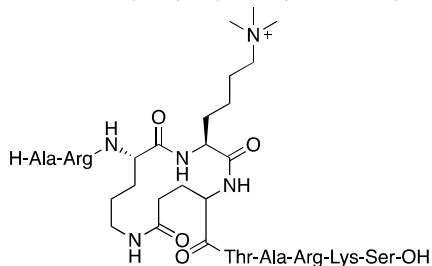



mmol, 4.9 eq.) and DIPEA (113  $\mu$ L, 1.2 mmol, 7.5 eq.) in DMF for 2 h at RT. Completion of cyclization was monitored with a colour Kaiser test, and the resin was subsequently treated with an excess of piperidine (20% in DMF) for 30 min at RT to remove the terminal Fmoc protection group. Deprotection was monitored with a colour Kaiser test. Extended cleavage of the resin with TFA/TIS/H<sub>2</sub>O/EDT (92.5/2.5/2.5/2.5) overnight at RT and subsequent precipitation, prep-HPLC and lyophilization following standard SPPS procedures afforded **6** as a white solid (13.9 mg, 11.7  $\mu$ mol, 7.4%). LC-MS (H<sub>2</sub>O, ITMS + p ESI, 10 eV) 297.00 (10%, [M+4H]<sup>4+</sup>), 395.72 (96%, [M+3H]<sup>3+</sup>), 593.08 (100%, [M+2H]<sup>2+</sup>), 827.44 (21%, [2×M+tfa+H]<sup>3+</sup>), 1184.88 (6%, [M+H]<sup>1+</sup>), 1298.76 (13%, [M+tfa+H]<sup>1+</sup>).

### **ARKazKme3PraTARKS (7)**

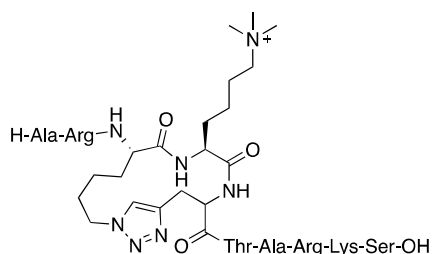

To a bubbling solution of H-AR-Lys(N<sub>3</sub>)-Kme3-PraTARKS-Wang (203.4mg, 40.7  $\mu$ mol, 0.2mmol g<sup>-1</sup>, 1 eq.) in DMF (1 mL) under argon was added CuBr (6.95 mg, 48.4  $\mu$ mol, 1.2 eq.) dissolved in degassed DMF (0.85 ml). Sodium ascorbate (10.17 mg, 51.2  $\mu$ mol, 1.3 eq.) was dissolved in water (0.180  $\mu$ L) and added to the resin mixture. 2,6-Lutidine (45.7 mg, 50.0  $\mu$ L, 427  $\mu$ mol, 10.5 eq.) and DIPEA (51.9 mg, 70.1  $\mu$ L, 402  $\mu$ mol, 9.9 eq.) were subsequently added before purging the reaction vessel with argon gas for 10 min.. The mixture was thereafter stirred for 18.5 h at 40 °C. The resin was extensively washed with DMF (3x), EtOH (3x), DMF (3x) and Et<sub>2</sub>O (3x) before being cleaved from the resin with TFA/TIS/H<sub>2</sub>O/EDT (92.5/2.5/2.5/2.5) over 4 h at RT. Subsequent precipitation yielded a greenish precipitate, and prep-HPLC and lyophilization afforded *white solid 7* (7.4 mg, 6.1  $\mu$ mol, 15.0%). IR measurements indicated cyclization. LC-MS (H<sub>2</sub>O, ITMS + p ESI, 10 eV) 303.12 (8%, [M+4H]<sup>4+</sup>), 403.64 (64%, [M+3H]<sup>3+</sup>), 605.00 (100%, [M+2H]<sup>2+</sup>), 843.80 (9%, [2×M+tfa+H]<sup>3+</sup>), 1208.80 (6%, [M+H]<sup>1+</sup>), 1322.72 (6%, [M+tfa+H]<sup>1+</sup>).

#### 4 Preparative HPLC of histone H3K4me3 peptides

*Table S1. HPLC Purification methods for the purification of H3K4me3 cyclic/linear peptides.*

| <i>Compound</i> | <i>Elution time (min)</i> | <i>Flow rate (mL/min)</i> | <i>Run Time (min)</i> | <i>Conc. ACN Idle (%)</i> | <i>Conc. gradient ACN (% at time in min)</i>      | <i>Temp. (°C)</i> |
|-----------------|---------------------------|---------------------------|-----------------------|---------------------------|---------------------------------------------------|-------------------|
| 1               | 9.9-12                    | 10                        | 20                    | 3                         | 3(3) to 3(9) to 100(13) to 100(16) to 3(18)       | 30/40             |
| 2               | 11-12                     | 10                        | 20                    | 4                         | 6(11) to 100(13) to 100(16) to 4(18)              | 40/40             |
| 3               | 8.5-9.6                   | 10                        | 20                    | 10                        | 12(3) to 17(14) to 100(15) to 100(19) to 10(19.5) | 40/40             |
| 4               | 18-19                     | 10                        | 17                    | 10                        | 12(3) to 18(14) to 100(15) to 100(16) to 10(16.5) | 40/40             |
| 5               | 8.8-10.2                  | 10                        | 20                    | 2.5                       | 3.5(13) to 100(14) to 100(18) to 2.5(19)          | 40/40             |
| 6               | 9-10                      | 10                        | 20                    | 2.5                       | 3.5(13) to 100(14) to 100(18) to 2.5(19)          | 40/40             |
| 7               | 6.5-7.5                   | 10                        | 20                    | 5                         | 5(9) to 100(13) to 100(16) to 5(18)               | 30/40             |

#### 5 LC-MS of histone H3K4me3 peptides

*Table S2. Masses found for H3K4me3 cyclic/linear peptides.*

| <i>Compound</i> | <i>Chemical formula</i>                                                                       | <i>Exact Mass</i> | <i>Mass found</i> |               |               |               |
|-----------------|-----------------------------------------------------------------------------------------------|-------------------|-------------------|---------------|---------------|---------------|
|                 |                                                                                               |                   | $[M+H]^+$         | $[M+2H]^{2+}$ | $[M+3H]^{3+}$ | $[M+4H]^{4+}$ |
| 1               | C <sub>49</sub> H <sub>94</sub> N <sub>19</sub> O <sub>15</sub>                               | 1188.72           | 1189.92           | 595.44        | 397.24        | 298.16        |
| 2               | C <sub>48</sub> H <sub>91</sub> N <sub>18</sub> O <sub>13</sub> S <sub>2</sub>                | 1191.64           | 1191.56           | 596.40        | 397.88        | 298.88        |
| 3               | C <sub>52</sub> H <sub>89</sub> N <sub>20</sub> O <sub>17</sub> S <sub>2</sub>                | 1329.62           | 1329.64           | 665.52        | 444.08        | 333.36        |
| 4               | C <sub>52</sub> H <sub>87</sub> F <sub>4</sub> N <sub>18</sub> O <sub>13</sub> S <sub>2</sub> | 1311.61           | 1311.52           | 656.40        | 437.96        | 328.72        |
| 5               | C <sub>49</sub> H <sub>92</sub> N <sub>19</sub> O <sub>14</sub>                               | 1170.71           | 1170.88           | 586.06        | 391.08        | 293.56        |
| 6               | C <sub>50</sub> H <sub>94</sub> N <sub>19</sub> O <sub>14</sub>                               | 1184.72           | 1184.88           | 593.08        | 395.72        | 297.00        |
| 7               | C <sub>51</sub> H <sub>94</sub> N <sub>21</sub> O <sub>13</sub>                               | 1208.73           | 1208.73           | 605.00        | 403.64        | 303.12        |

**A)**

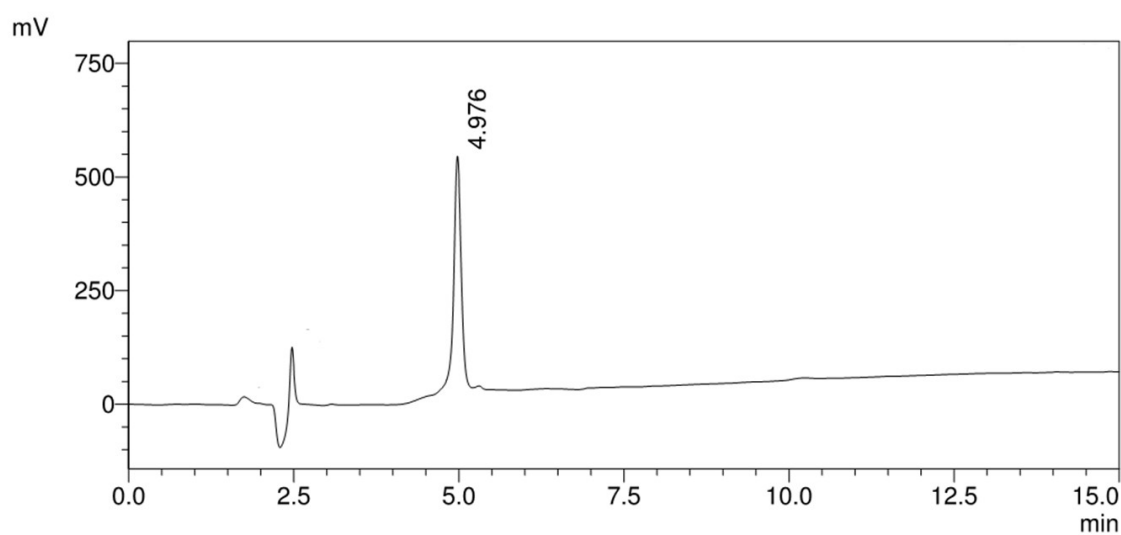

**B)**

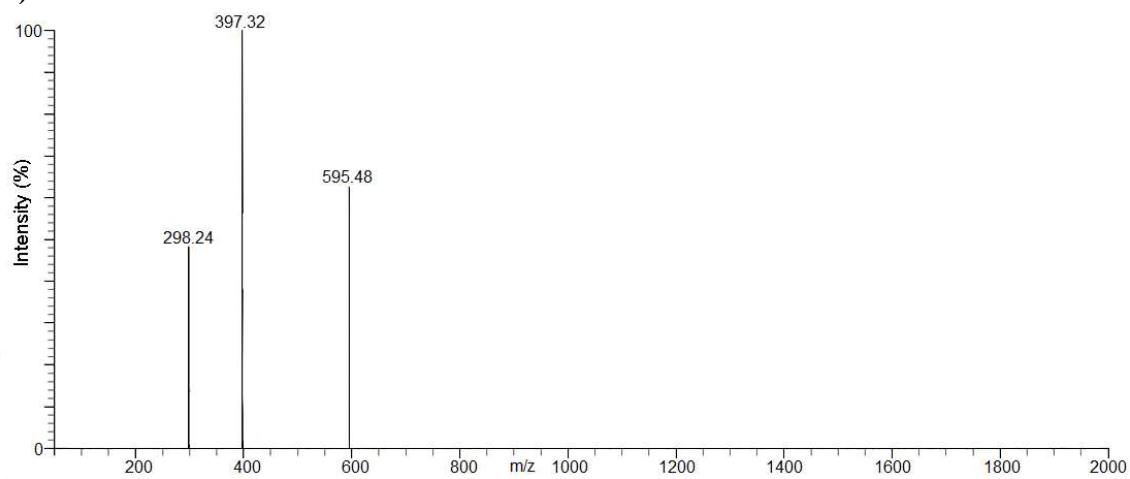

Figure S2. (A) Analytical HPLC profile and (B) ESI-MS analysis of the peptide **1** after prep-HPLC purification. The peptide elutes at 5.0 min.

A)

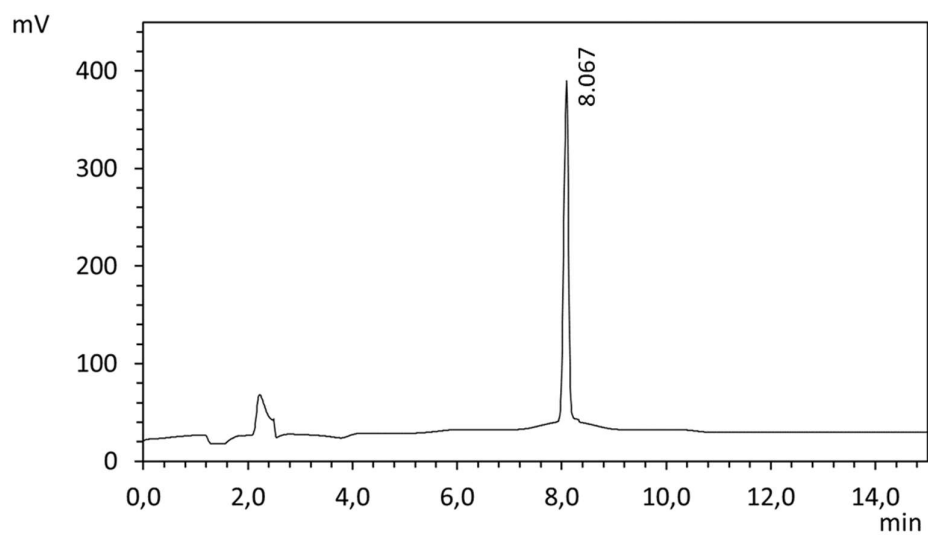

B)

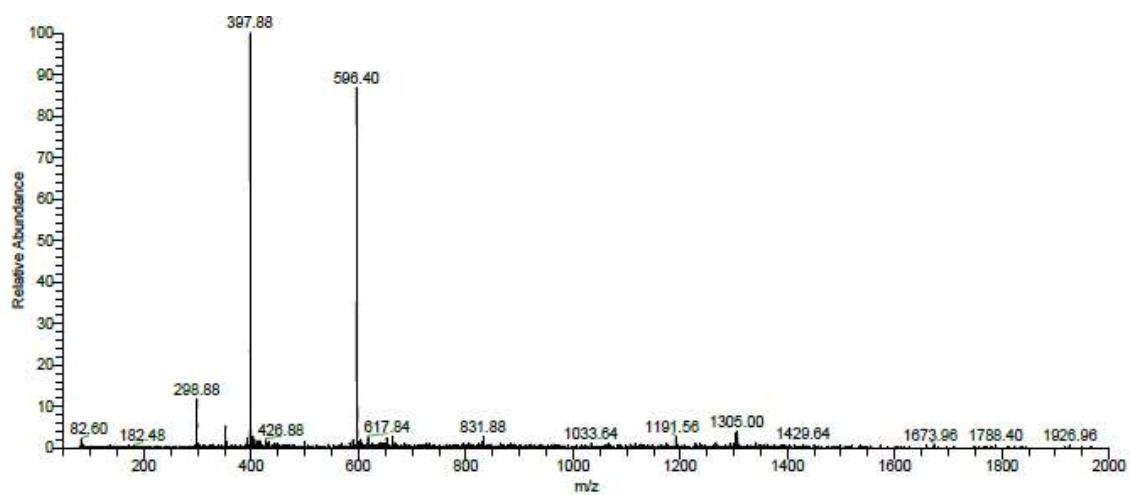

Figure S3. (A) Analytical HPLC profile and (B) ESI-MS analysis of the peptide **2** after prep-HPLC purification. The peptide elutes at 8.1 min.

A)

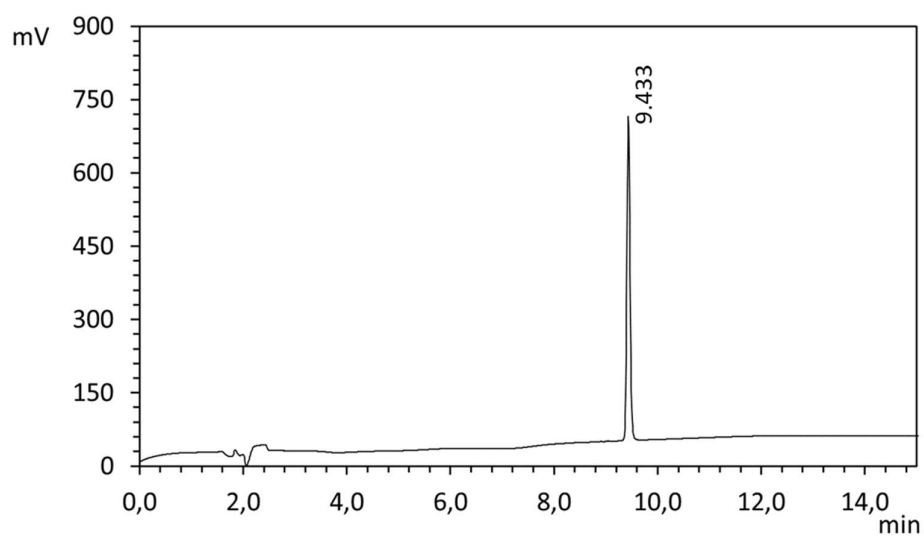

B)

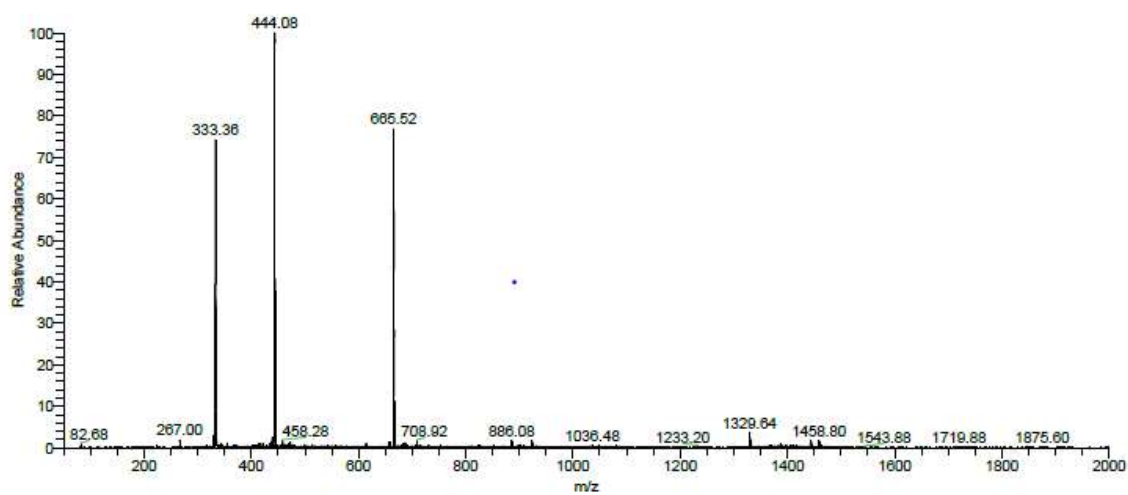

Figure S4. (A) Analytical HPLC profile and (B) ESI-MS analysis of the peptide **3** after prep-HPLC purification. The peptide elutes at 9.4 min.

**A)**

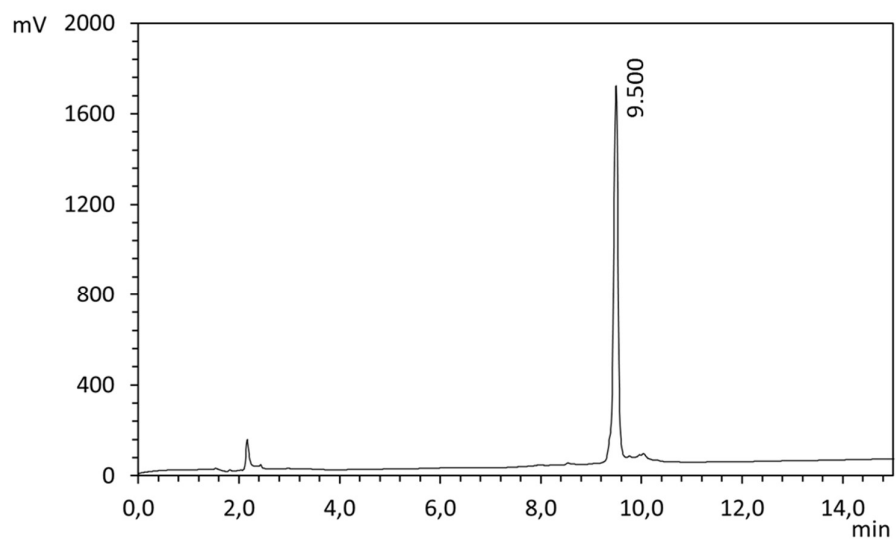

**B)**

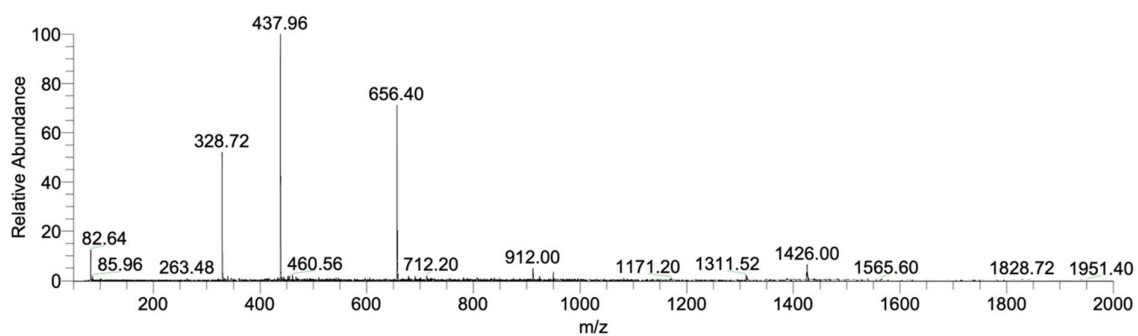

Figure S5. (A) Analytical HPLC profile and (B) ESI-MS analysis of the peptide **4** after prep-HPLC purification. The peptide elutes at 9.5 min.

**A)**

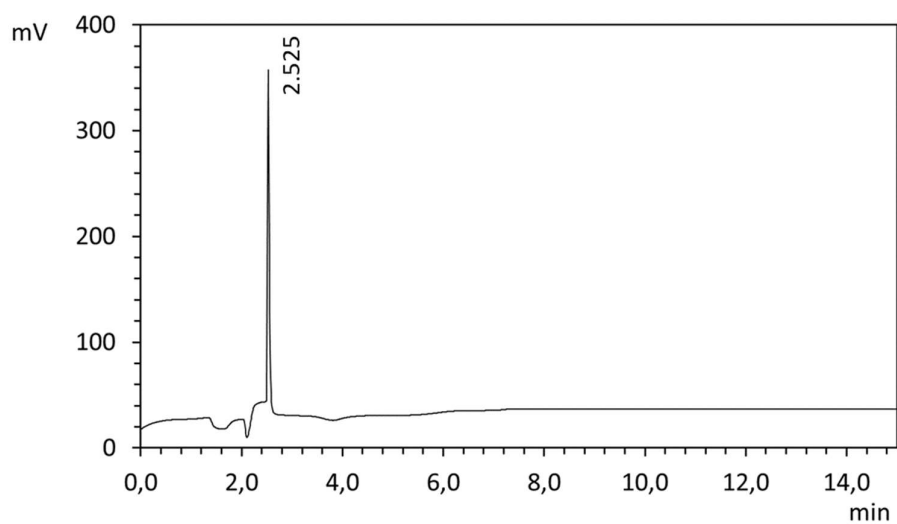

**B)**

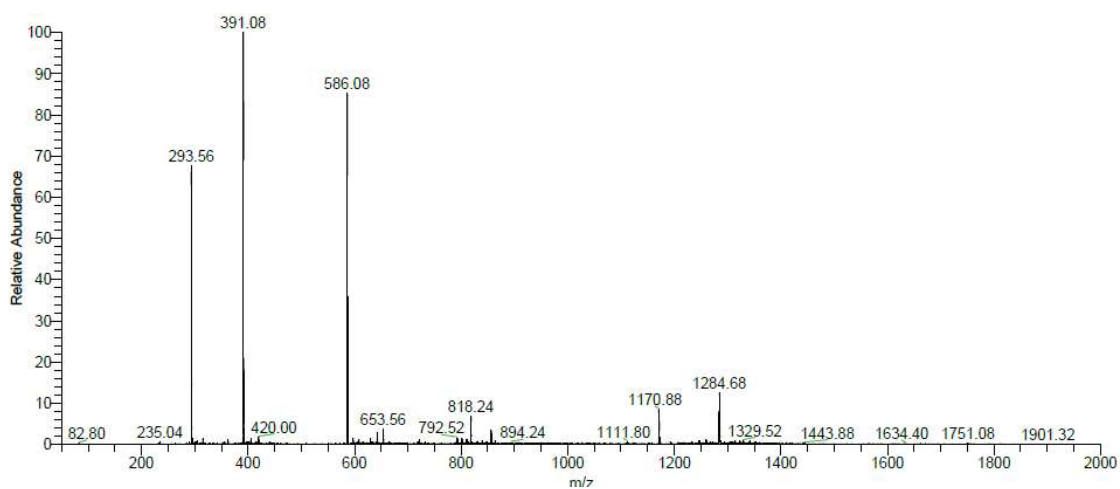

Figure S6. (A) Analytical HPLC profile and (B) ESI-MS analysis of the peptide **5** after prep-HPLC purification. The peptide elutes at 2.5 min.

**A)**

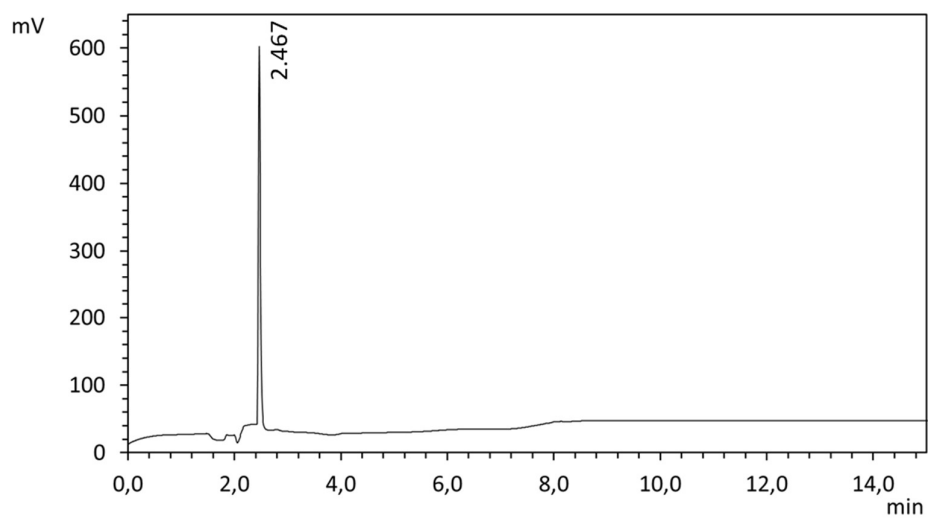

**B)**

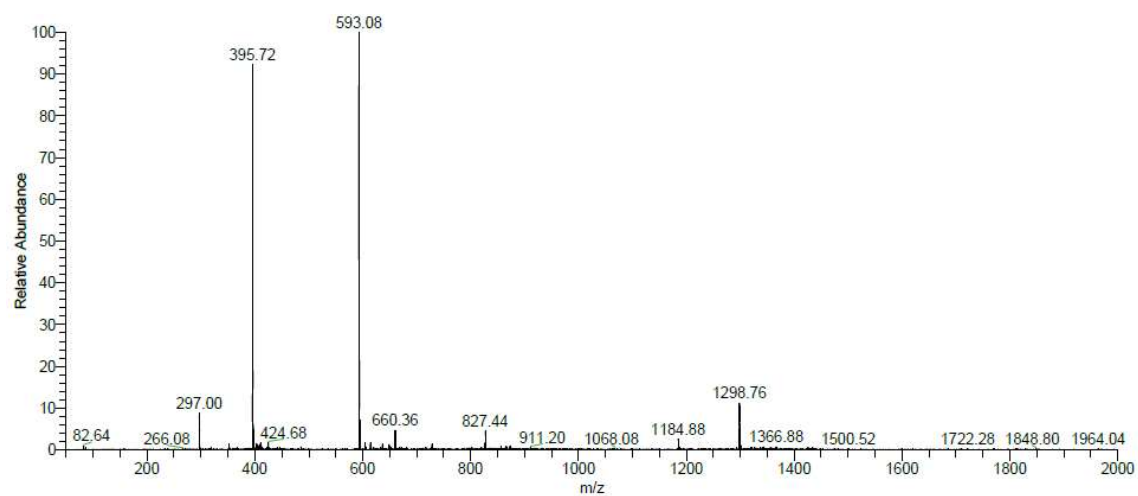

Figure S7. (A) Analytical HPLC profile and (B) ESI-MS analysis of the peptide **6** after prep-HPLC purification. The peptide elutes at 2.5 min.



**A)**

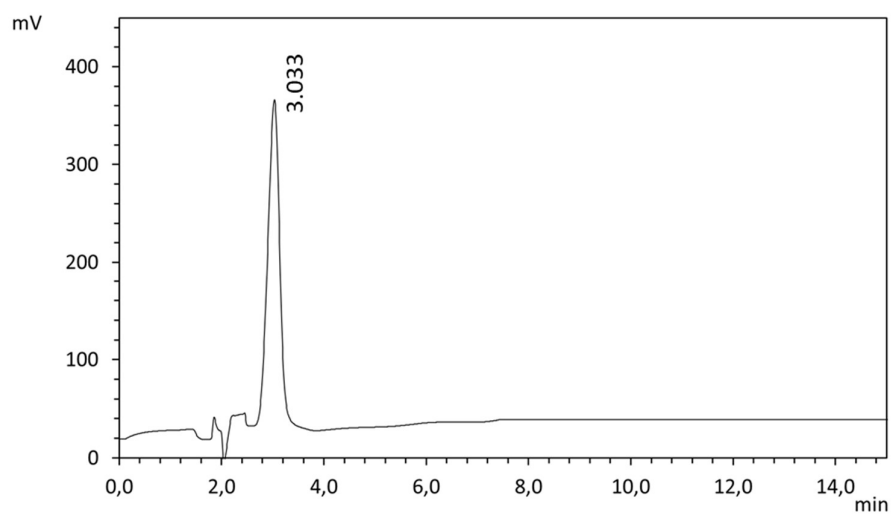

**B)**

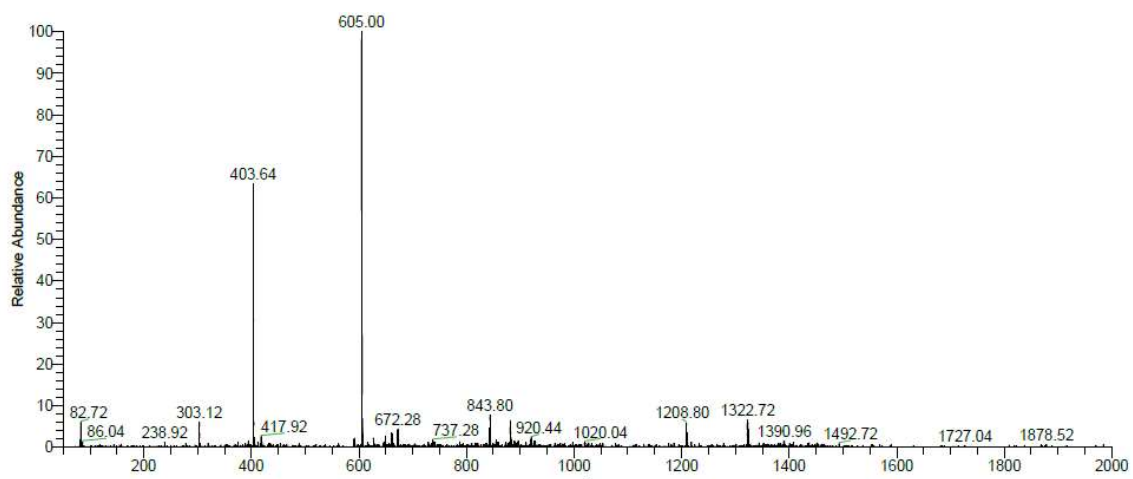

Figure S8. (A) Analytical HPLC profile and (B) ESI-MS analysis of the peptide **7** after prep-HPLC purification. The peptide elutes at 3.0 min.

## 6 IR spectra

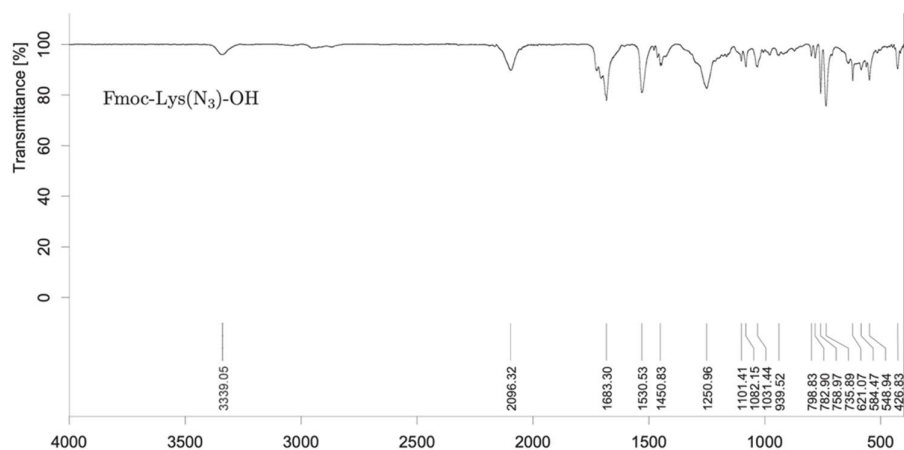

Figure S9. IR-Spectrum of Fmoc-Lys(N<sub>3</sub>)-OH. Azide specific peak can be observed at 2096.32 nm.

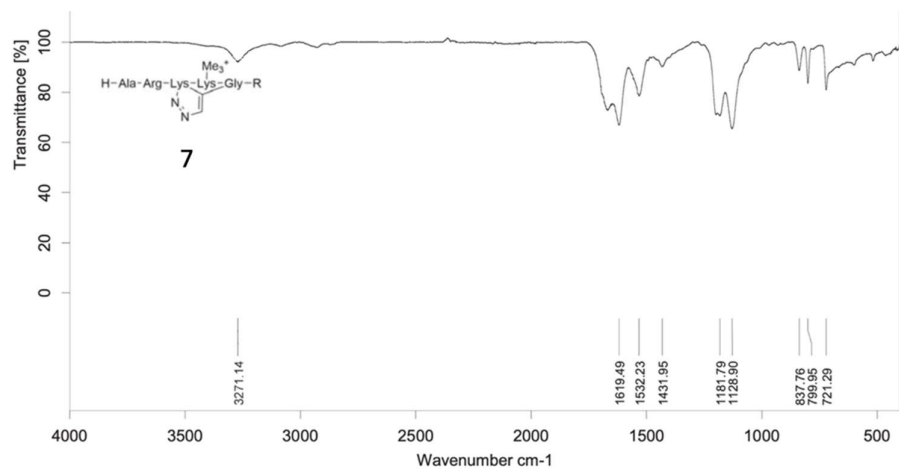

Figure S10. IR-Spectrum of peptide 7. Azide specific peak cannot be observed around 2096.32 nm, which indicates successful cyclization.

## 7 ITC supporting figures

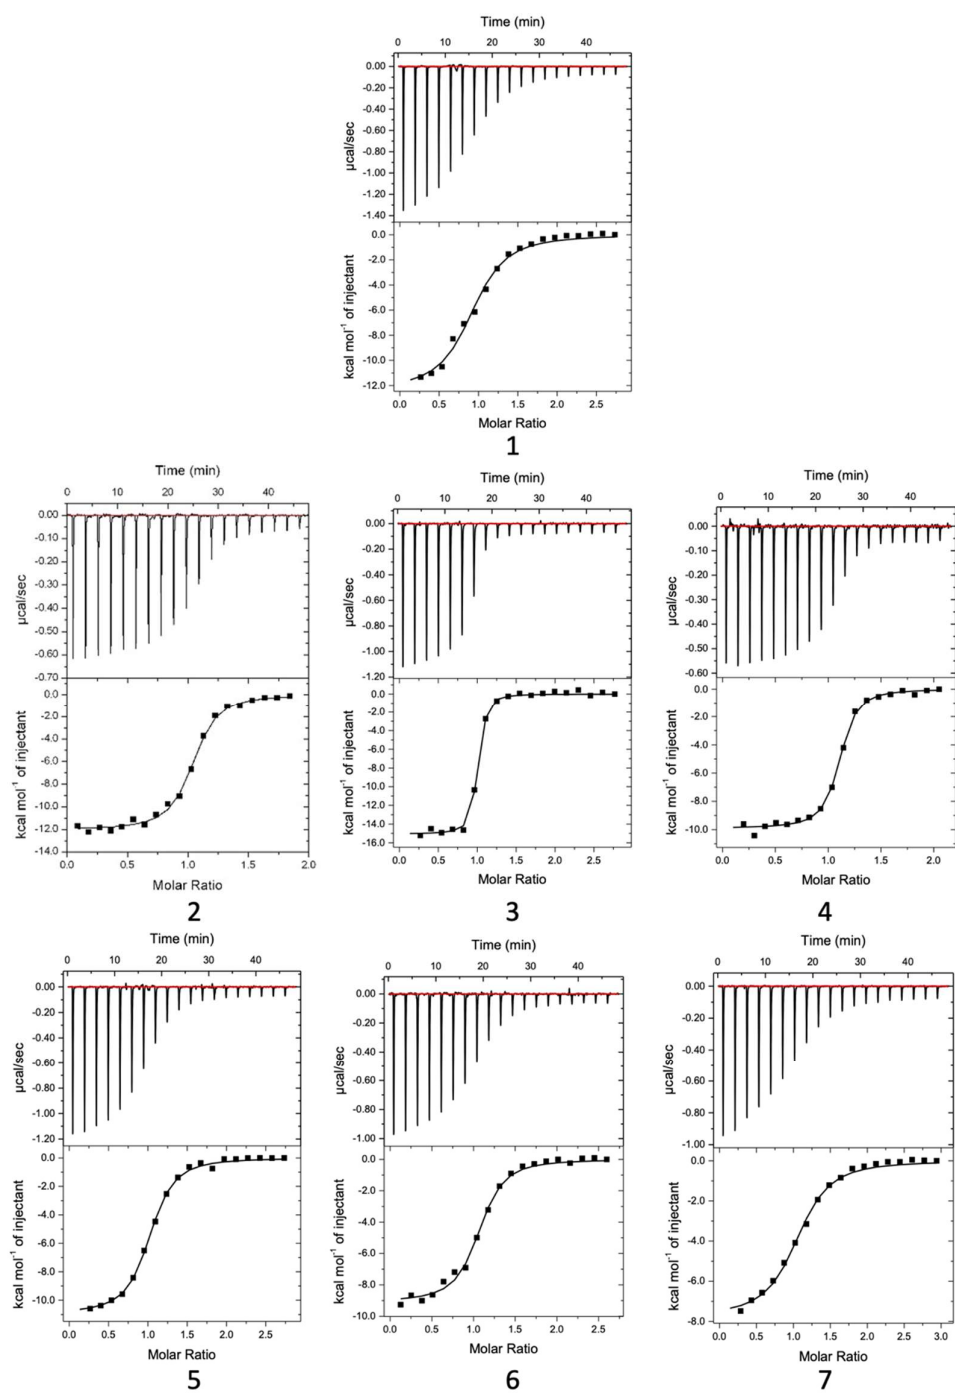

Figure S11. ITC binding curves of BPTF with peptides 1-7.

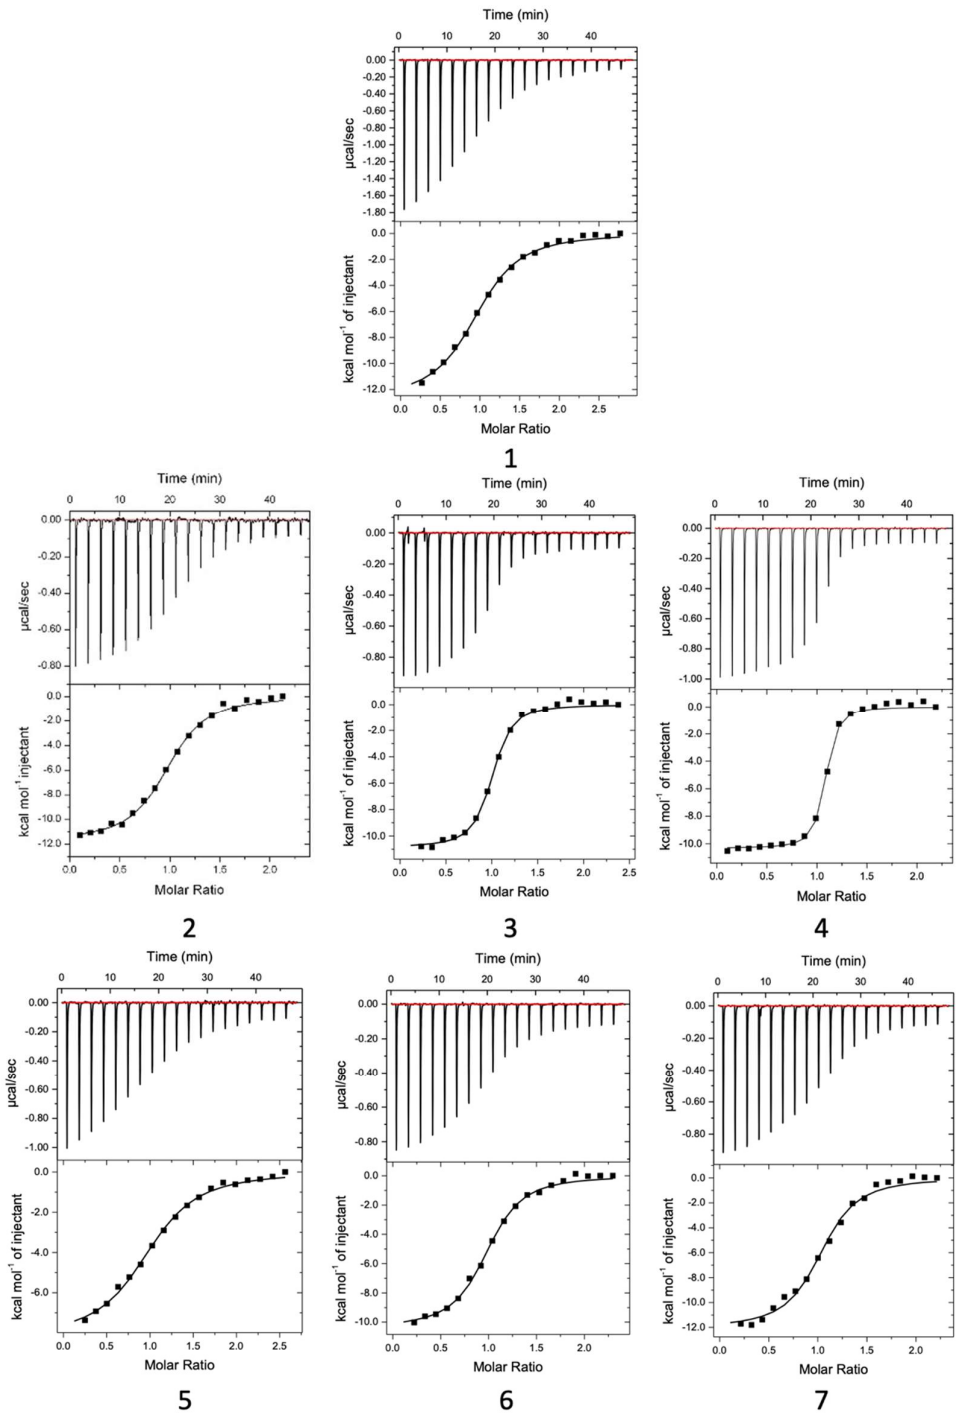

Figure S12. ITC binding curves of JMJD2A with peptides **1-7**.

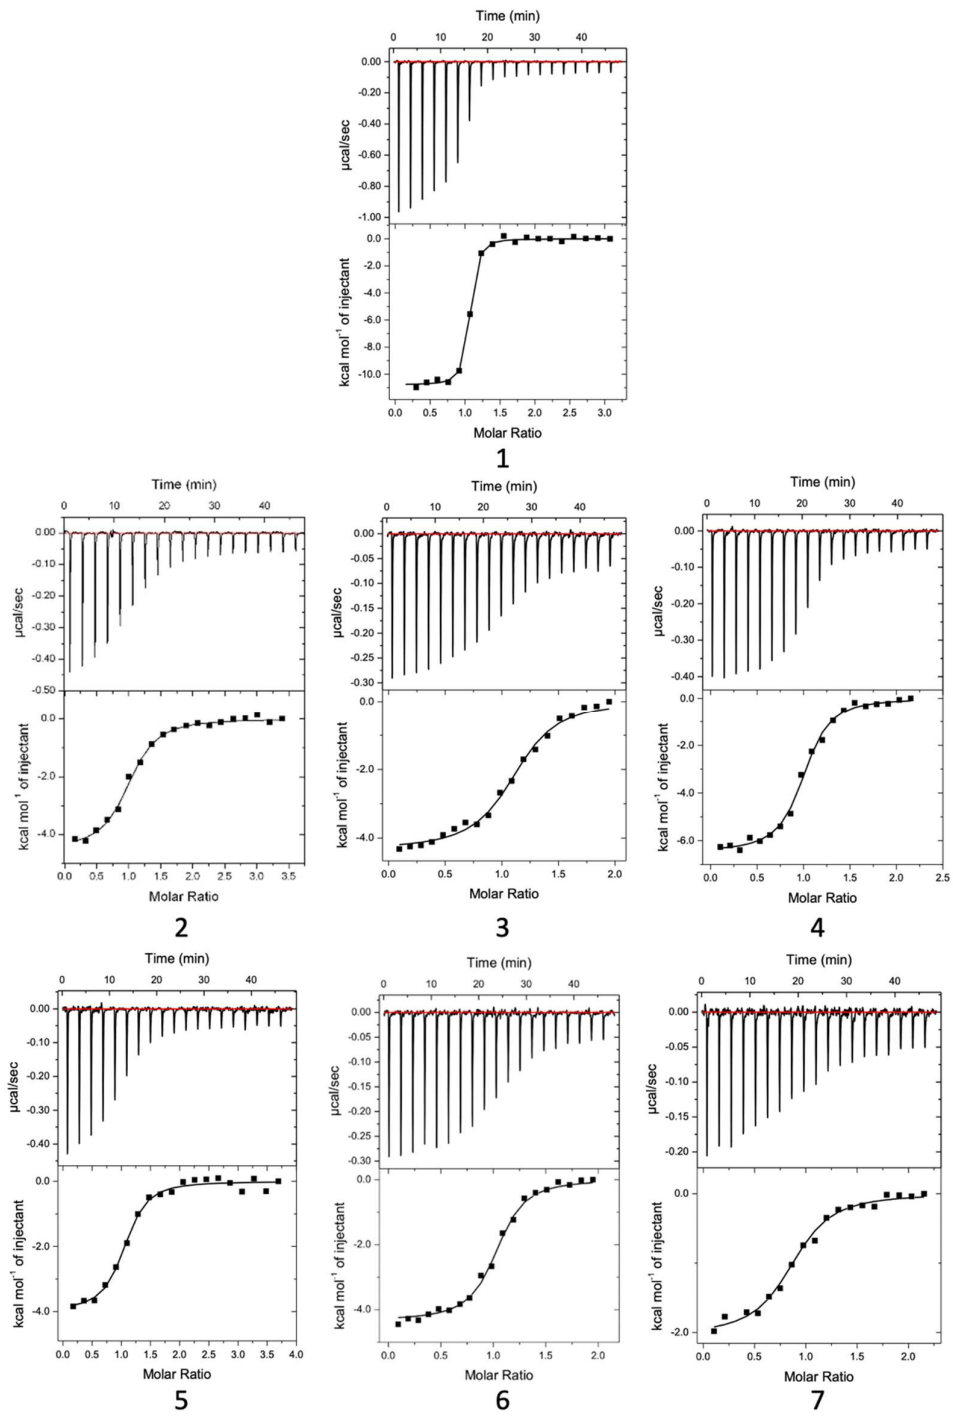

Figure S13. ITC binding curves of JARID1A with peptides 1-7.

## 8 Docking

The crystallized structures of JMJD2A and BPTF in complex with H3K4me3 (PDB ID: 2GFA, X-ray crystal structure resolution 2.10 Å, PDB ID: 2F6J, X-ray crystal structure resolution 2.00 Å) were obtained from the Protein Data Bank.<sup>3,4</sup> and were imported into Schrödinger Suite's Maestro module.<sup>5</sup> Imported files were pre-processed to add missing hydrogen atoms, removing H<sub>2</sub>O molecules, and to assigning bond orders. PROPKA was applied to determine the protein protonation state at pH 7.0 and steric contacts were alleviated (OPLS\_2005).

Linear and constrained H3K4me3 sequences were imported into the Maestro module and the LigPrep tool was used to generate minimized tautomers by applying force field minimization (OPLS\_2005) and ionization at pH 7.0 (Epik).<sup>6,7</sup> Receptor grids were generated of the H3K4me3 containing 2F6J and 2GFA structures with initial van der Waals scaling of 1 Å. The grid box was defined using K4me3 as the centroid. Constrained H3K4me3 (ARCKCT) peptide was docked into 2F6J and 2GFA using the generated receptor grid with Glide using the Extra Precision (XP) mode with ligand flexibility parameters enabled.<sup>8</sup> The resulting predicted complex was subsequently used for Induced Fit Docking (IFD) of the histone tail pentapeptides using the Extended sampling-docking mode.<sup>9</sup> IFD was executed by using initial van der Waals scaling of 0.5 for the receptor and ligand, ligand backbone restraintment within 4 Å of the docked H3 (ARCKCT) backbone, and with refinement of receptor residues within 5 Å of the docking ligands.

A) BPTF<sub>PHD</sub>

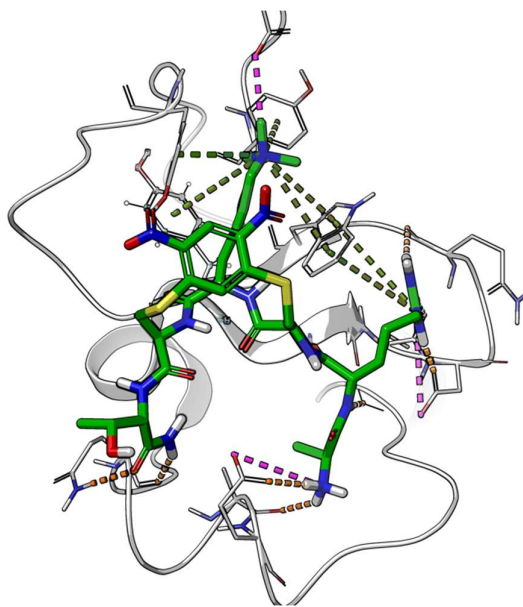

B) BPTF<sub>PHD</sub>

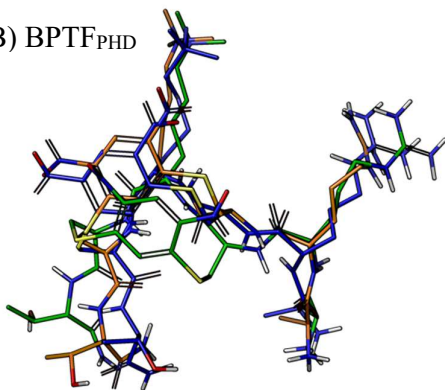

C) JMJD2A<sub>ATD</sub>

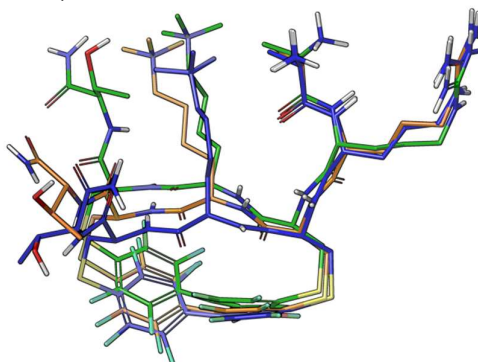

Figure S14. Additional computational analysis of docked histone peptide structures. Key interactions are displayed: hydrogen bond (orange), cation- $\pi$  interactions (green), and salt-bridges (pink). A) Induced-fit docking of **3** in BPTF<sub>PHD</sub>. B-C) Overlay of three highest scoring (glide score) induced-fit docking poses (residues 1-6) of **3** and **4**.

## 9 References

1. B. Pieters, R. Belle and J. Mecinovic, *ChemBioChem*, 2013, **14**, 2408-2412.
2. R. Belle, A. H. K. Al Temimi, K. Kumar, B. Pieters, A. Tumber, J. E. Dunford, C. Johansson, U. Oppermann, T. Brown, C. J. Schofield, R. J. Hopkinson, R. S. Paton, A. Kawamura and J. Mecinovic, *Chem. Commun.*, 2017, **53**, 13264-13267.
3. H. Li, S. Ilin, W. Wang, E. M. Duncan, J. Wysocka, C. D. Allis and D. J. Patel, *Nature*, 2006, **442**, 91-95.
4. Y. Huang, J. Fang, M. T. Bedford, Y. Zhang and R. M. Xu, *Science*, 2006, **312**, 748-751.
5. Schrödinger Release 2021-1: Maestro, Schrödinger, LLC, New York, NY, 2021.
6. Schrödinger Release 2021-1: LigPrep, Schrödinger, LLC, New York, NY, 2021.
7. Schrödinger Release 2021-1: Epik, Schrödinger, LLC, New York, NY, 2021.
8. Schrödinger Release 2021-1: Glide, Schrödinger, LLC, New York, NY, 2021.
9. Schrödinger Release 2021-1: Induced Fit Docking protocol; Glide, Schrödinger, LLC, New York, NY, 2021.
